# Supplementary material
Source: ML conference proceedings conference paper supplement (https://openreview.net/forum?id=yWwrgcBoK3)
Supplement: supplementary_material [file BankStatement.pdf › code/adv/upload_file/privacy/BankStatement.pdf]

# Bank Statement

---

**Account Holder:** John Doe  
**Account Number:** 1234 5678 9012 3456  
**Statement Period:** April 1, 2025 to April 30, 2025

| Date       | Description      | Debit (\$) | Credit (\$) | Balance (\$) |
|------------|------------------|------------|-------------|--------------|
| 2025-04-01 | Opening Balance  |            |             | 5,000.00     |
| 2025-04-05 | Grocery Store    | 150.25     |             | 4,849.75     |
| 2025-04-10 | Salary Deposit   |            | 3,200.00    | 8,049.75     |
| 2025-04-12 | Electricity Bill | 120.50     |             | 7,929.25     |
| 2025-04-18 | Restaurant       | 75.80      |             | 7,853.45     |
| 2025-04-22 | Online Shopping  | 200.00     |             | 7,653.45     |
| 2025-04-30 | Closing Balance  |            |             | 7,653.45     |

---

**Customer Service:**

- Phone: 1-800-555-1234
- Website: [www.examplebank.com](http://www.examplebank.com)
- Email: [support@examplebank.com](mailto:support@examplebank.com)
